# Supplementary material for: Redox-responsive supramolecular amphiphiles based on a pillar[5]arene for enhanced photodynamic therapy
Source: Royal Society of Chemistry journal article supplement (doi:10.1039/c6py00505e), 2016-01-01
Supplement: c6py00505e1.pdf [file c6py00505e1.pdf]

## Supporting Information

# Redox-responsive Supramolecular Amphiphilics Based on Pillar[5]arene for Enhanced Photodynamic Therapy

Ye Chen, Leilei Rui, Lichao Liu, Weian Zhang\*

*Shanghai Key Laboratory of Functional Materials Chemistry, East China University of Science and Technology, 130 Meilong Road, Shanghai 200237, P. R. China*

*\*Correspondence to: Weian Zhang ([wazhang@ecust.edu.cn](mailto:wazhang@ecust.edu.cn))*

### 1. Synthesis of PEG-P[5]A

Poly(ethylene glycol)-functionalized pillar[5]arene (PEG-P[5]A) was prepared according to our previous work<sup>1</sup> and the synthetic procedure was shown in **Scheme. S1**.

### 2. Synthesis of TPPC6-SS-COOH

The carboxyl-terminated porphyrin (TPPC6-SS-COOH) was prepared according to our previous work<sup>2</sup> and TPPC6-SS-COOH was further used to synthesize pyridinium-terminated porphyrin derivative bearing a disulfide bond (TPPC6-SS-Py), as shown in **Scheme. S2**.

### 3. Synthesis of the Model Guest Compound (**G<sub>M</sub>**)

1-Bromobutane (0.685 g, 5 mmol) and excessive amount of pyridine (0.5 mL, 6 mmol) were refluxed in acetone at 70 °C for 1 day. After the solvent was removed under vacuum, the product **G<sub>M</sub>**, *N*-butyl pyridinium bromide was obtained as a yellow solid (0.98 g, 90%). <sup>1</sup>H NMR (400 MHz, D<sub>2</sub>O) δ (ppm): 9.47 (d, 2H, pyridinium-H), 8.69 (t, 1H, pyridinium-H), 8.18 (m, 2H, pyridinium-H), 5.03 (t, 2H, N-CH<sub>2</sub>-), 2.02 (m, 2H, N-CH<sub>2</sub>-CH<sub>2</sub>-), 1.51 (m, 2H, N-(CH<sub>2</sub>)<sub>2</sub>-CH<sub>2</sub>-), 1.01 (t, 3H, -CH<sub>3</sub>) ( **Fig. S15**).

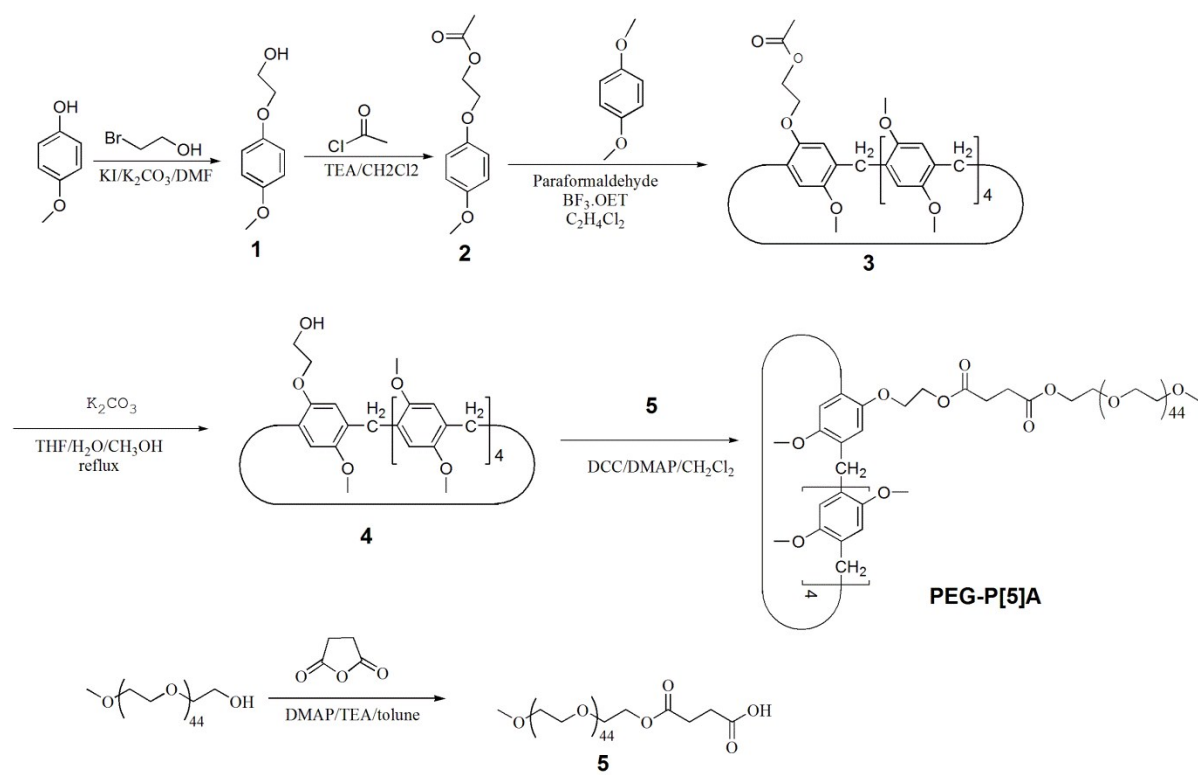

**Scheme. S1** Synthetic route of PEG-P[5]A

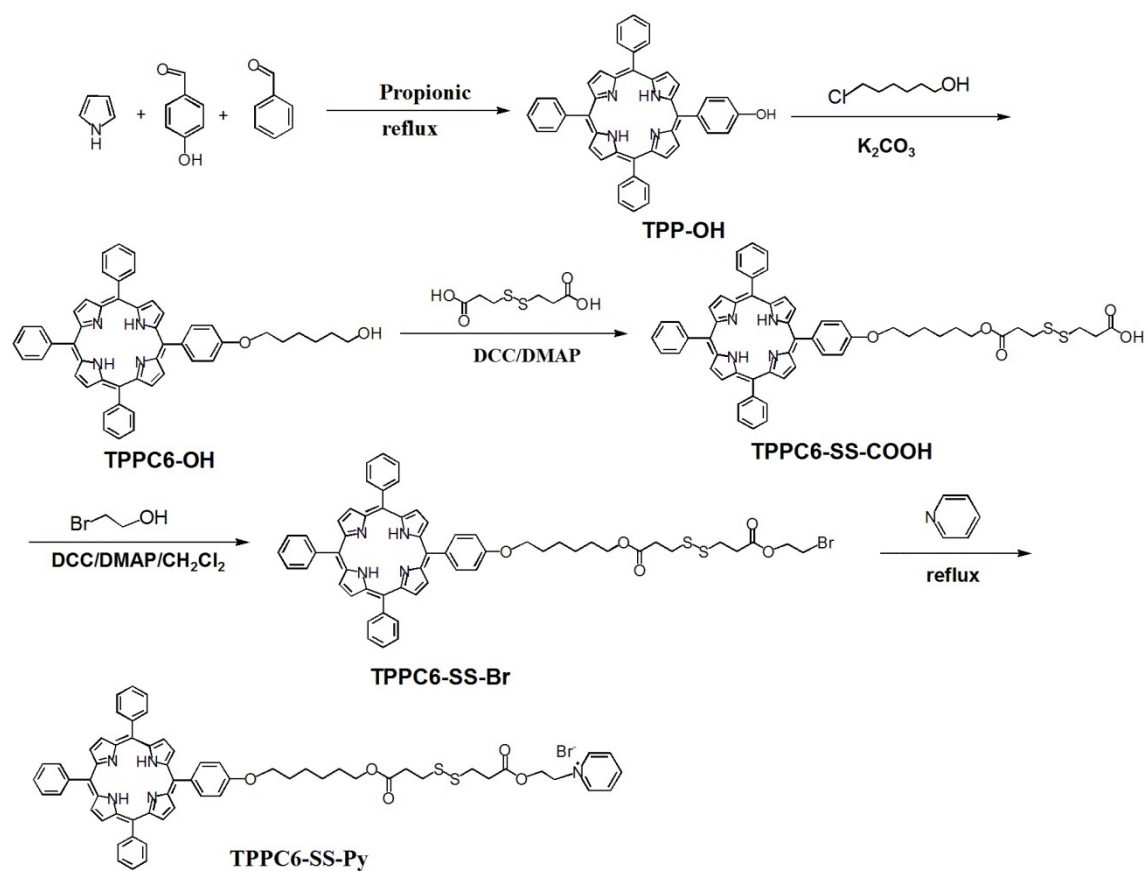

**Scheme. S2** Synthetic route of TPPC6-SS-Py

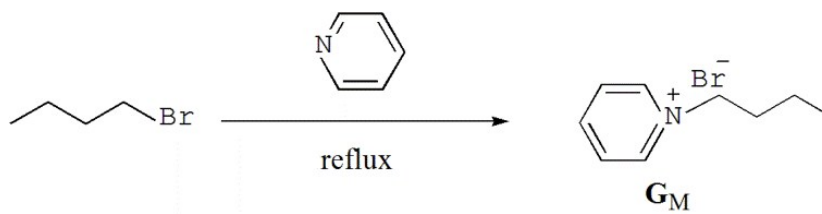

**Scheme. S3** Synthetic route of  $G_M$

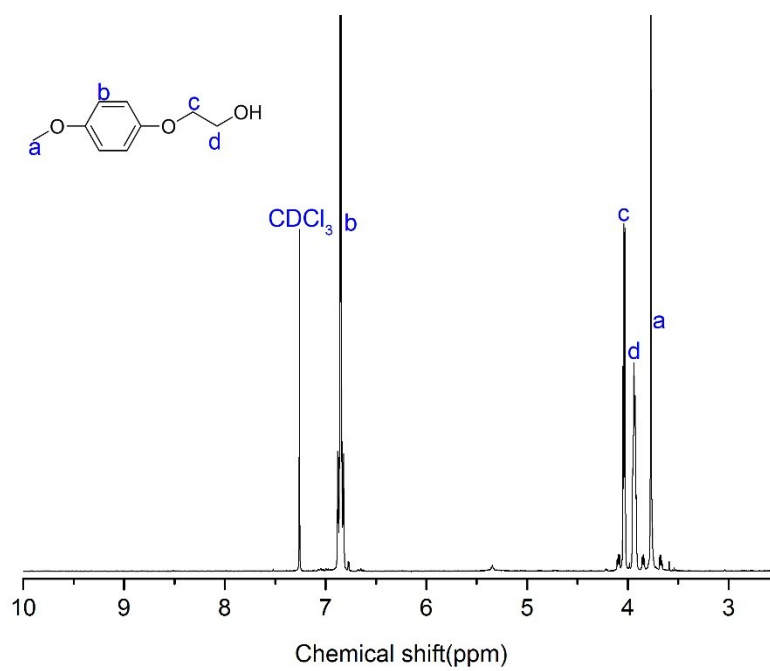

**Fig. S1**  $^1\text{H}$  NMR spectrum of **1**

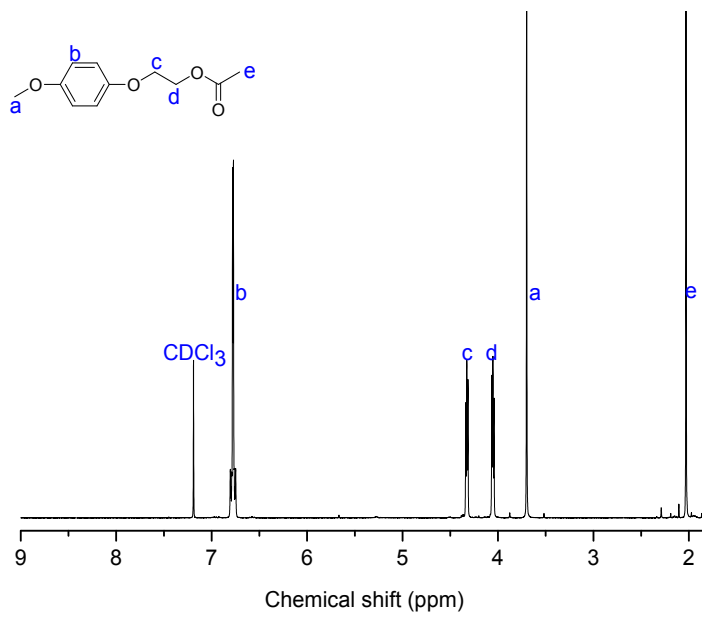

**Fig. S2** <sup>1</sup>H NMR spectrum of 2

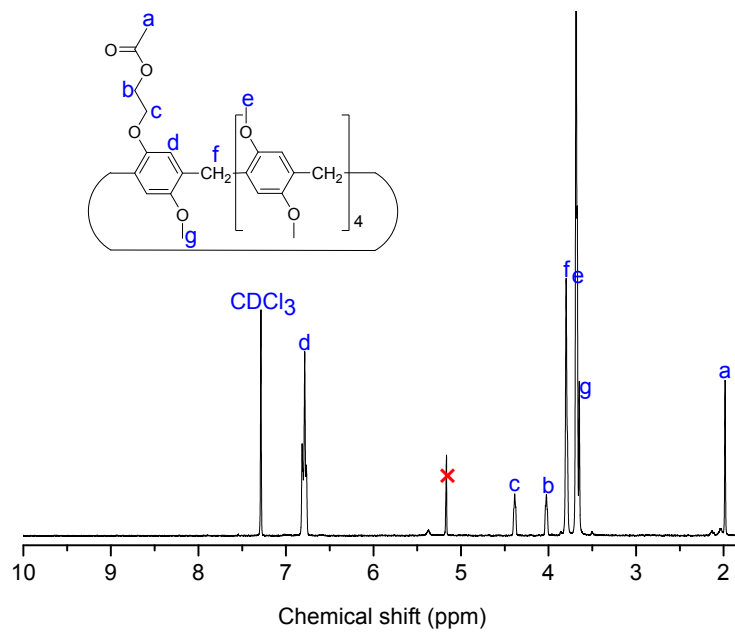

**Fig. S3** <sup>1</sup>H NMR spectrum of 3

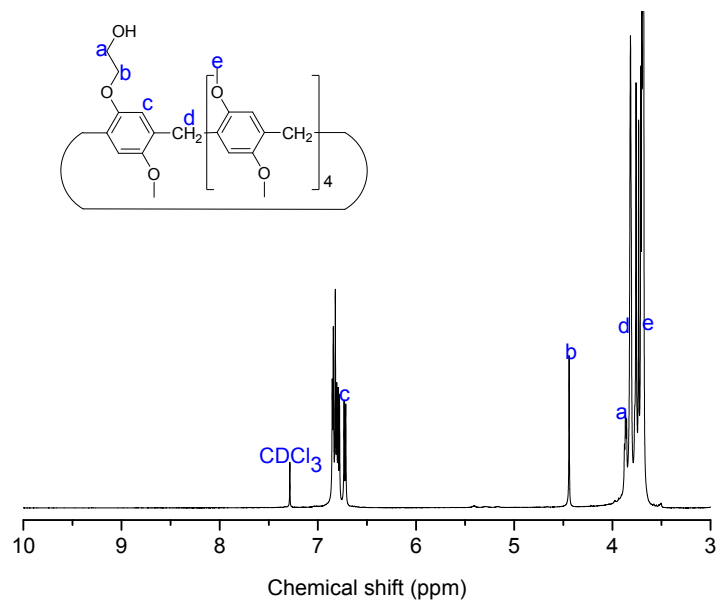

**Fig. S4** <sup>1</sup>H NMR spectrum of **4**

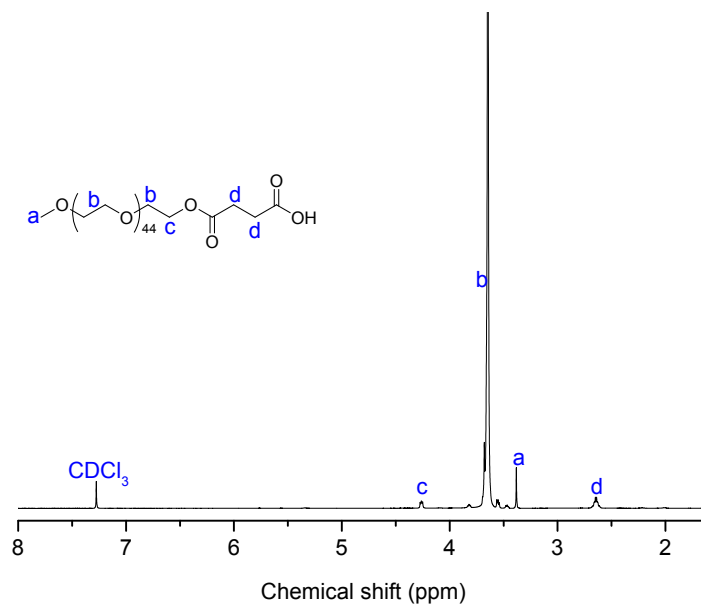

**Fig. S5** <sup>1</sup>H NMR spectrum of **5**

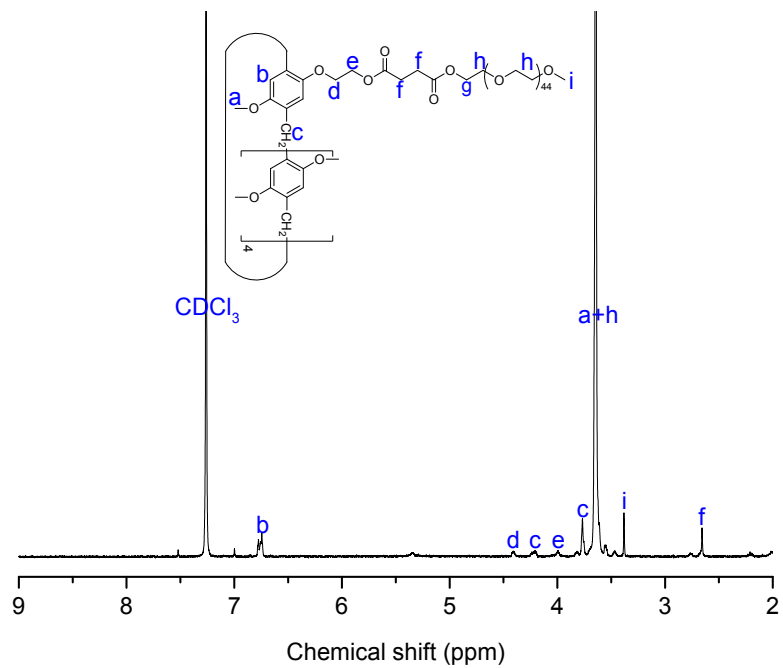

**Fig. S6**  $^1\text{H}$  NMR spectrum of **PEG-P[5]A**

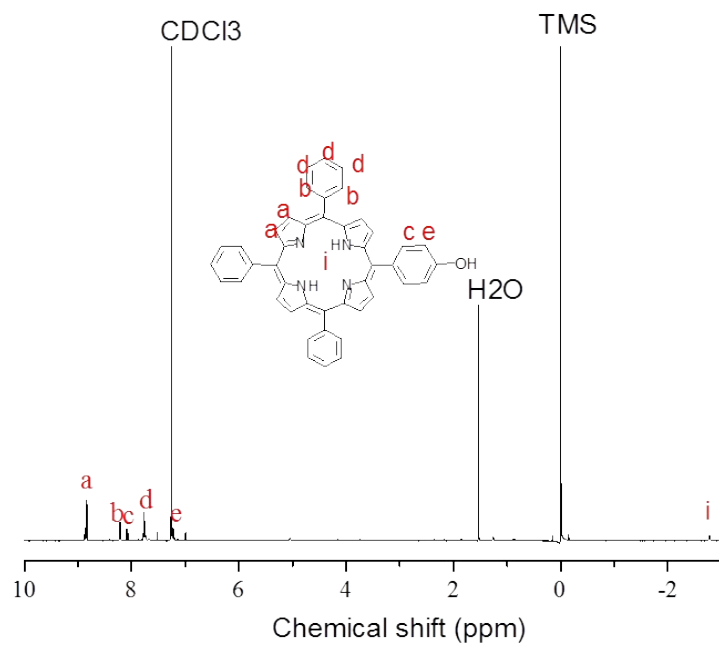

**Fig. S7**  $^1\text{H}$  NMR spectrum of **TPP-OH**



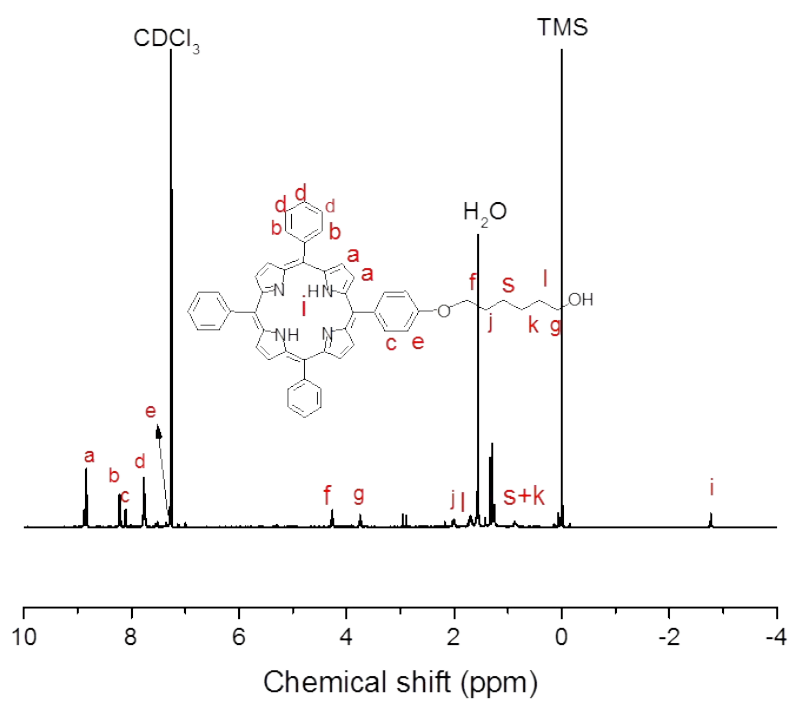

**Fig. S8** <sup>1</sup>H NMR spectrum of **TPPC6-OH**

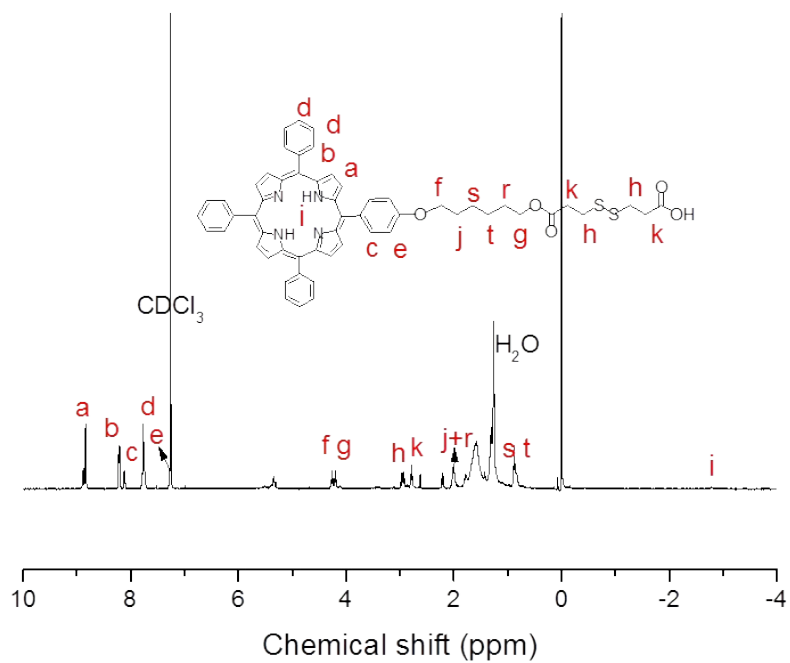

**Fig. S9** <sup>1</sup>H NMR spectrum of **TPPC6-SS-COOH**

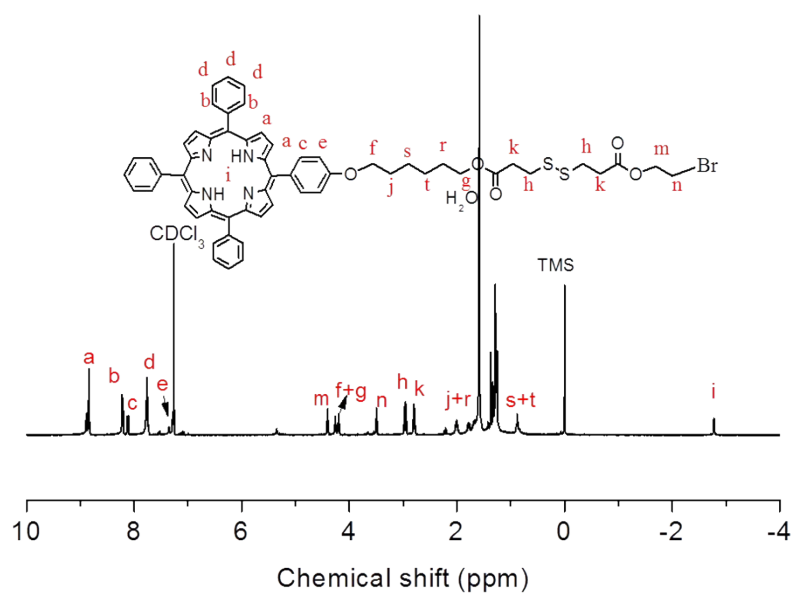

**Fig. S10**  $^1\text{H}$  NMR spectrum of TPPC6-SS-Br

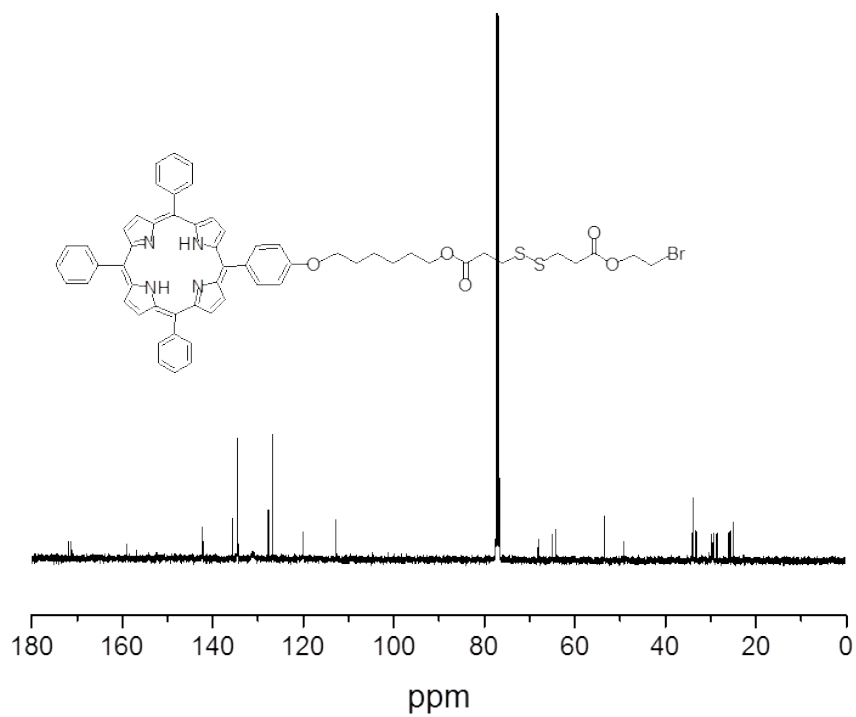

**Fig. S11**  $^{13}\text{C}$  NMR spectrum of TPPC6-SS-Br in  $\text{CDCl}_3$

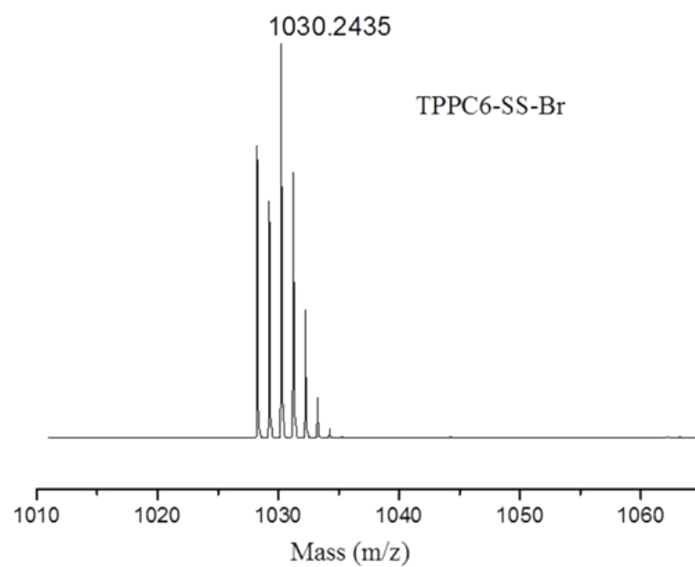

**Fig. S12** MALDI-TOF-MS spectrum for **TPPC6-SS-Br**, calcd for  $C_{58}H_{53}BrN_4O_5S_2$ , 1030.10; found: 1030.2435.

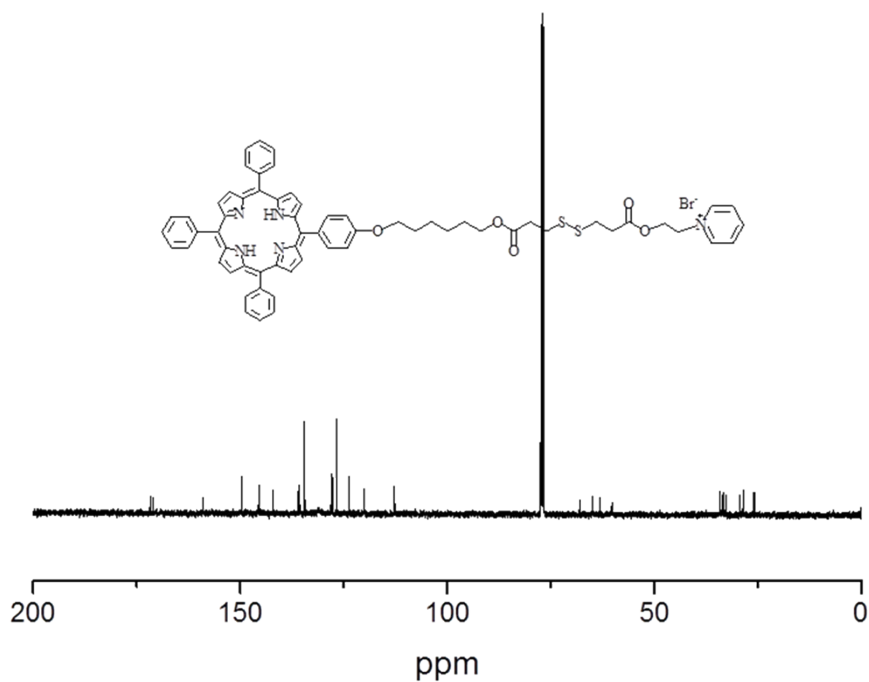

**Fig. S13**  $^{13}C$  NMR spectrum of **TPPC6-SS-Py** in  $CDCl_3$

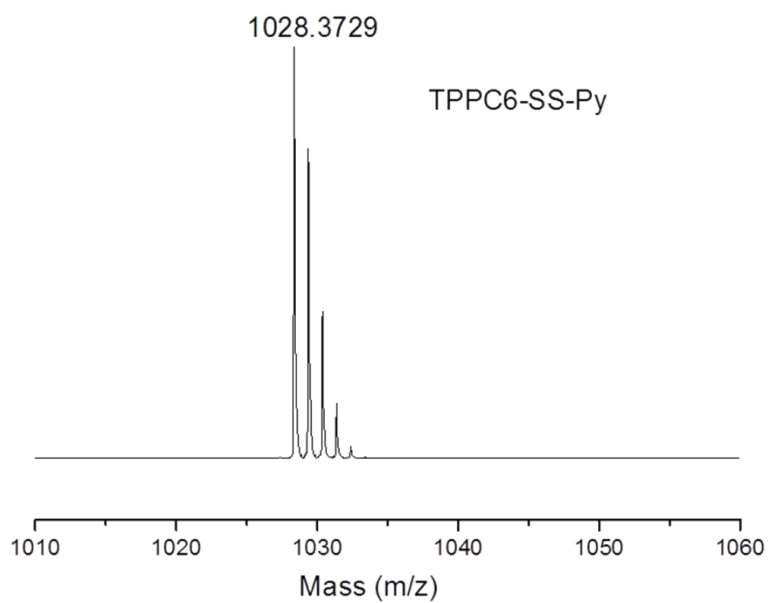

**Fig. S14** MALDI-TOF-MS spectrum of TPPC6-SS-Py, calcd for  $[M-Br]^+$  :  $C_{63}H_{58}N_5O_5S_2$ , 1028.39; found: 1028.3729.

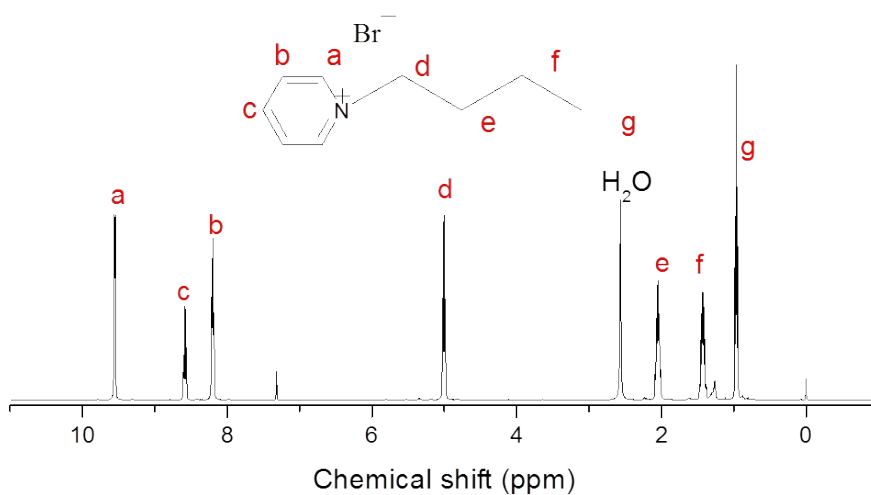

**Fig. S15**  $^1H$  NMR spectrum of  $G_M$

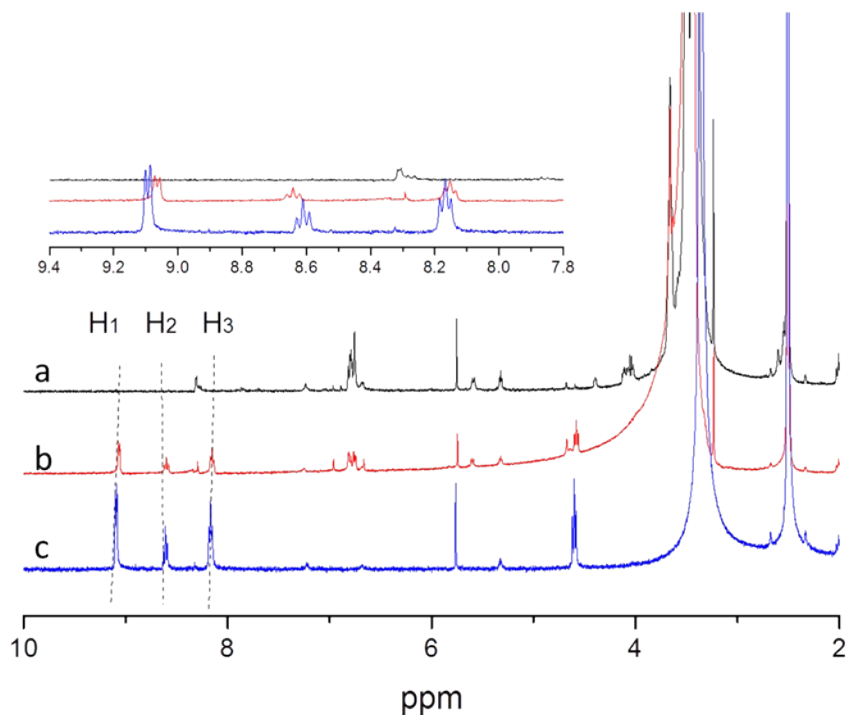

**Fig. S16** Partial <sup>1</sup>H NMR spectra (400 MHz, DMSO-*d*<sub>6</sub>) of a) PEG-P[5]A (2 mM), b) a 1:1 mixture of PEG-P[5]A and G<sub>M</sub> and c) G<sub>M</sub> (2 mM).

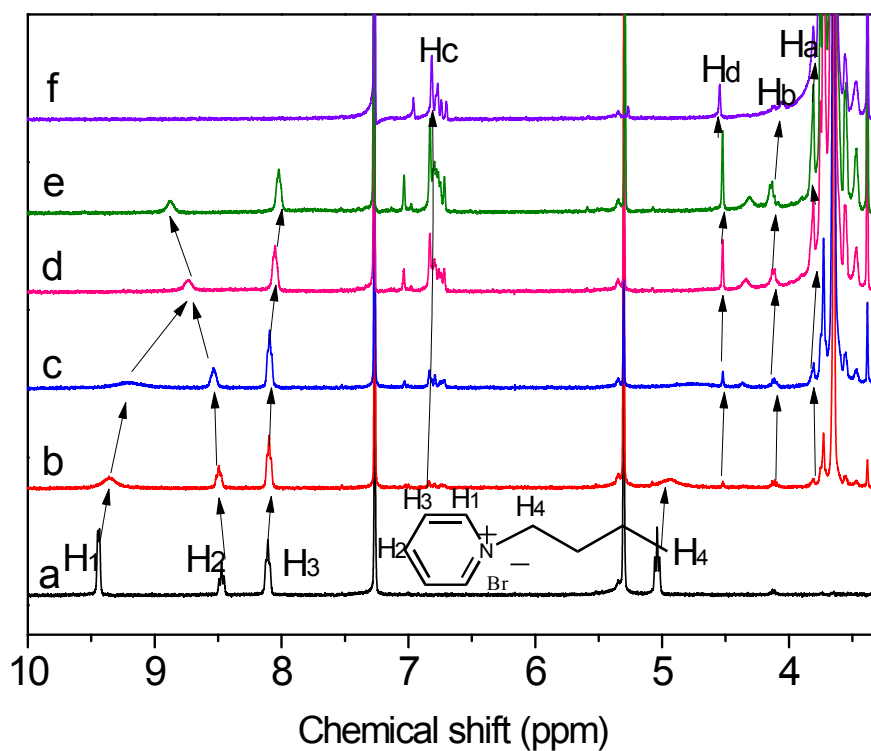

**Fig. S17** Partial <sup>1</sup>H NMR spectra (400 MHz, CDCl<sub>3</sub>) of G<sub>M</sub> at a constant concentration of 2 mM with different concentrations of PEG-P[5]A: (a) 0.00 mM, (b) 0.5 mM, (c) 1.00 mM, (d) 2.00 mM, (e) 4.00 mM, and (f) only PEG-P[5]A at 2 mM.

### Investigation of the Interactions between PEG-P[5]A and $G_M$

To determine the association constant for the complexation between PEG-P[5]A and  $G_M$ , fluorescence titration experiments were carried out in solutions which had a constant concentration of PEG-P[5]A ( $2.5 \times 10^{-5}$  M) and varying concentrations of  $G_M$ . By a non-linear curve-fitting method, the association constant ( $K_a$ ) of PEG-P[5]A $\rightarrow$  $G_M$  was estimated.<sup>3</sup>

The non-linear curve-fittings were based on the equation:

$$\Delta F = (\Delta F_\infty/[H]_0) (0.5[G]_0 + 0.5([H]_0 + 1/K_a) - (0.5 ([G]_0^2 + (2[G]_0(1/K_a - [H]_0) + (1/K_a + [H]_0)^2)^{0.5})) \quad (\text{eq. 1})$$

Where  $\Delta F$  is the fluorescence intensity changes at 330 nm at  $[H]_0$ ,  $\Delta F_\infty$  is the fluorescence intensity changes at 330 nm when PEG-P[5]A is completely complexed,  $[G]_0$  is the initial concentration of  $G_M$ , and  $[H]_0$  is the fixed initial concentration of PEG-P[5]A.

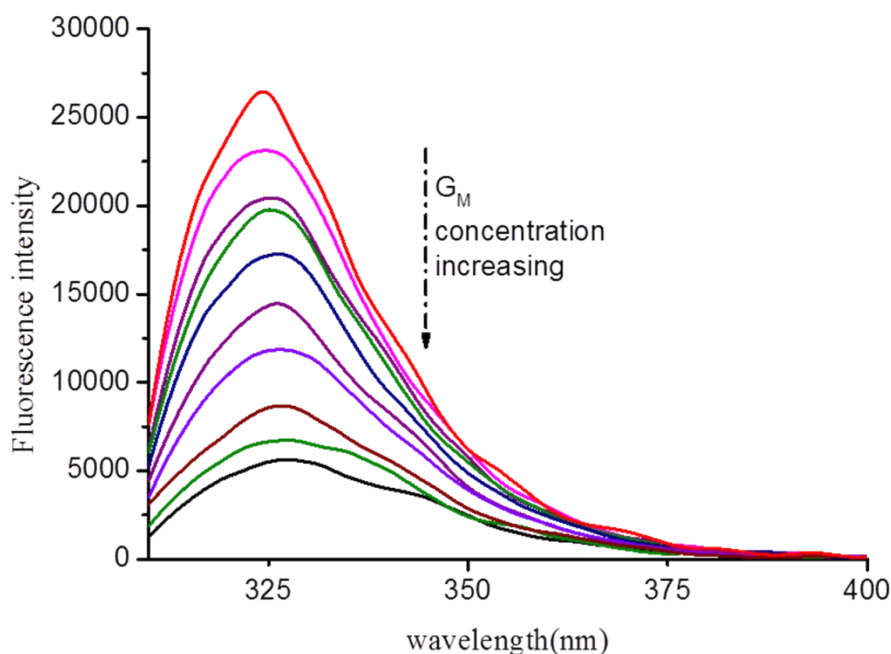

**Fig. S18** Fluorescence spectra of PEG-P[5]A ( $2.5 \times 10^{-5}$  M) upon addition of  $G_M$  (0 -  $14.5 \times 10^{-5}$  M) in DMF at room temperature. Upon addition of  $G_M$ , emission from PEG-P[5]A was quenched, indicating the formation of the PEG-P[5]A- $G_M$  complex.

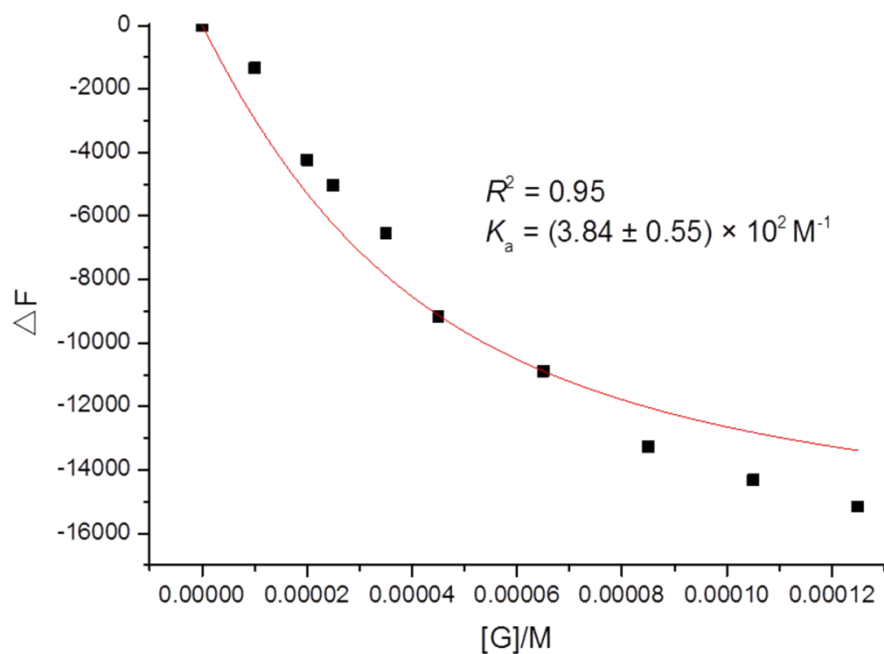

**Fig. S19** The fluorescence changes of PEG-P[5]A upon addition of  $G_M$ . The red solid line was obtained from the non-linear curve-fitting using eq. 1.

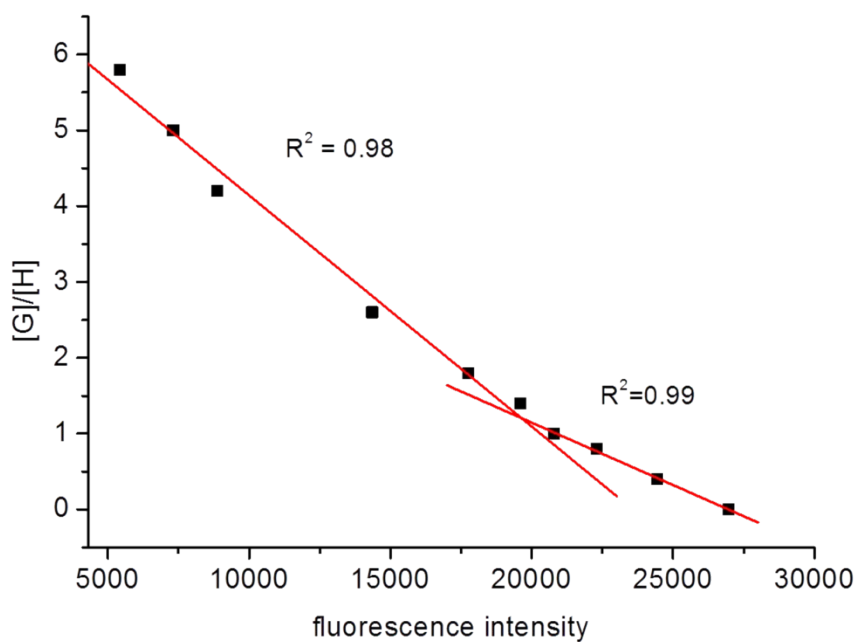

**Fig. S20** Mole ratio plot for PEG-P[5]A and  $G_M$ , indicating a 1:1 stoichiometry.

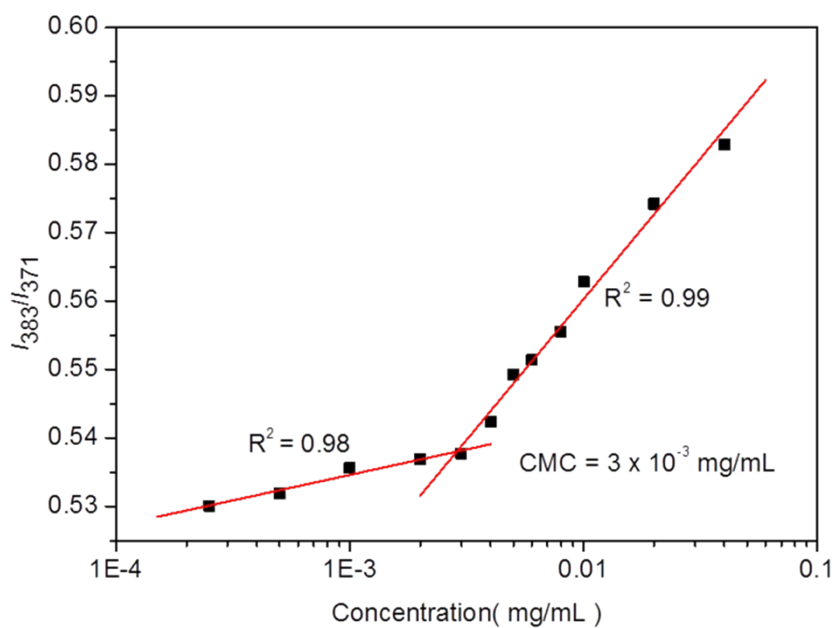

**Fig. S21** Plot of the  $I_{382}/I_{372}$  ratio with different concentrations of PEG-P[5]A /TPPC6-SS-Py micelles.

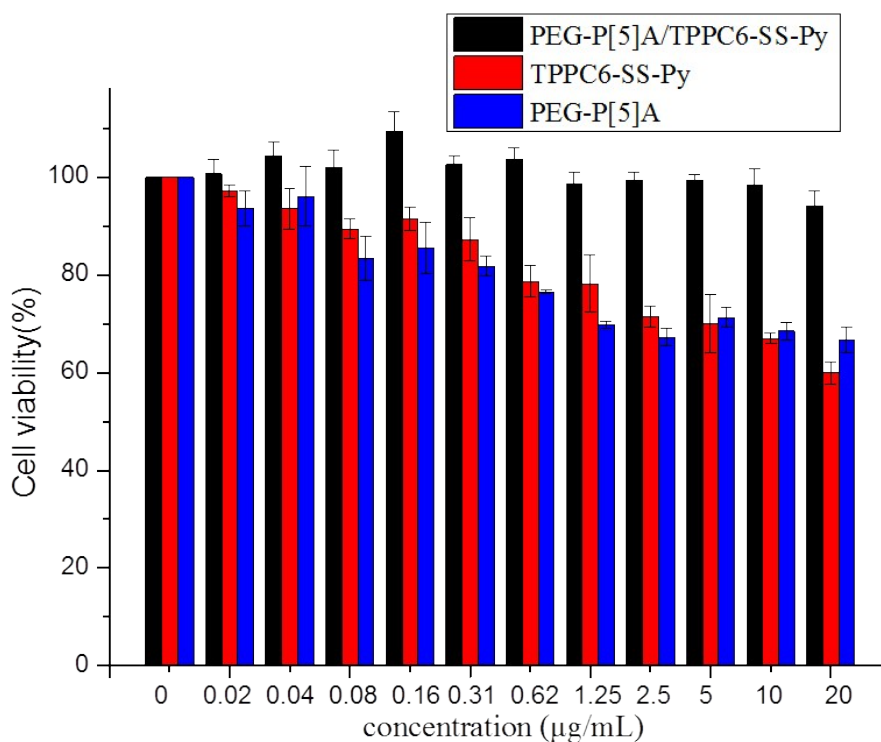

**Fig. S22** Viability of A549 cells measured by the MTT assay after treating with different concentration of PEG-P[5]A/TPPC6-SS-Py, TPPC6-SS-Py and PEG-P[5]A without light irradiation.



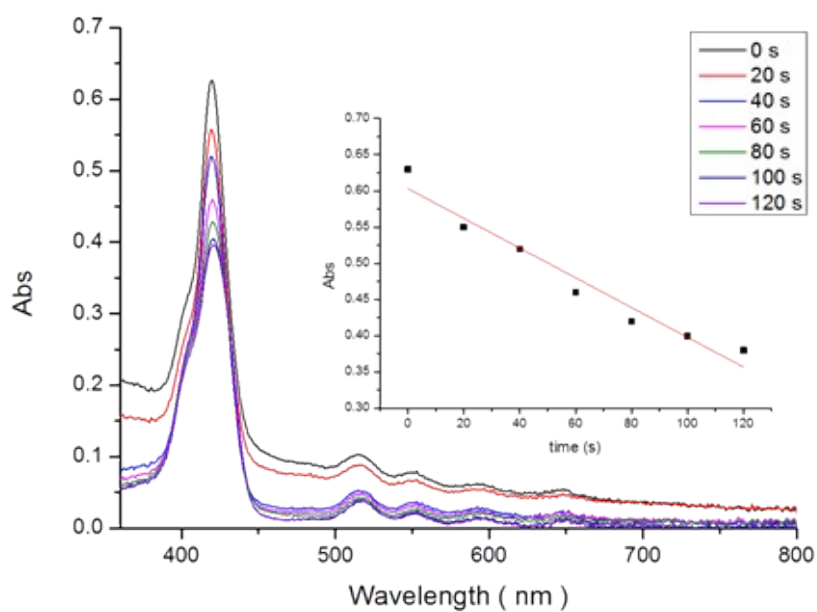

**Fig. S23** UV-Vis absorption spectra of DPBF with supramolecular micelles after irradiation for different times (inset: plot of absorbance versus concentration).

## References

1. L. Rui, L. Liu, Y. Wang, Y. Gao and W. Zhang, *ACS Macro Lett.*, 2016, **5**, 112-117.
2. F. Liu, Y. Ma, L. Xu, L. Liu and W. Zhang, *Biomater. Sci.*, 2015, **3**, 1218-1227.
3. Q. Duan, Y. Cao, Y. Li, X. Hu, T. Xiao, C. Lin, Y. Pan and L. Wang, *J. Am. Chem. Soc.*, 2013, **135**, 10542-10549.
